# Supplementary material
Source: publisher figshare collection journal article supplement (https://acs.figshare.com/ndownloader/files/4311865)
Supplement: Supplementary file 1 [file 4311865]

## Supporting Information

---

### Formation and Properties of Chitosan–Cellulose Nanocrystal Polyelectrolyte–Macroion Complexes for Drug Delivery Applications

Hezhong Wang and Maren Roman\*

Macromolecules and Interfaces Institute and Department of Wood Science and Forest Products,  
Virginia Tech, Blacksburg, VA 24061, USA

\*Corresponding author. E-mail: maren.roman@vt.edu. Tel: +1 540-231-1421. Fax: +1 540-231-8176.

---

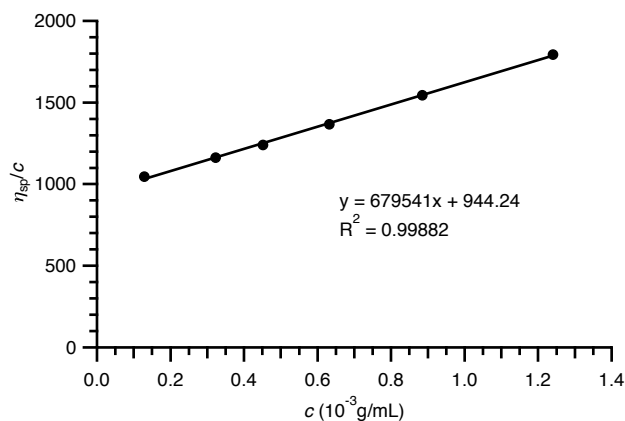

**Figure S1.** Plot of the reduced viscosity,  $\eta_{sp}/c$ , versus concentration,  $c$ , for determination of the intrinsic viscosity of the purified chitosan

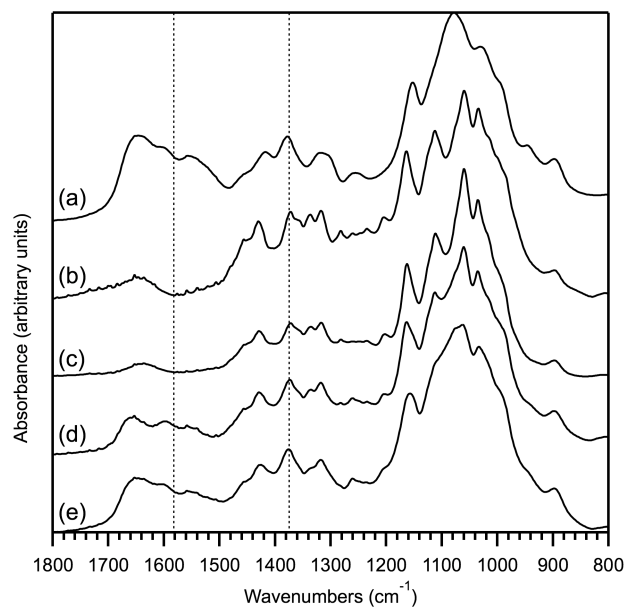

**Figure S2.** Fingerprint regions of the FTIR spectra shown in Figure 6. The ratios of the absorbances at 1581 and 1375  $\text{cm}^{-1}$  ( $A_{1581}/A_{1375}$ ) were used for quantification of the chitosan content.

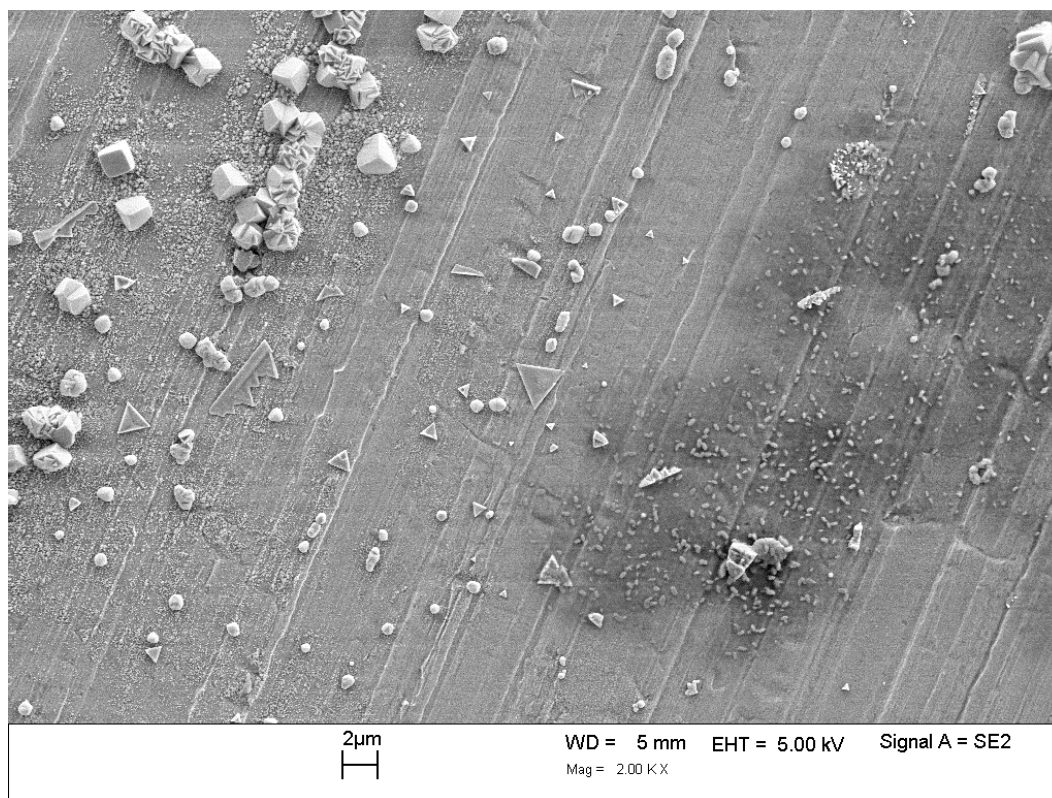

**Figure S3.** FE-SEM image of PMC particles showing salt crystals and other artifacts.

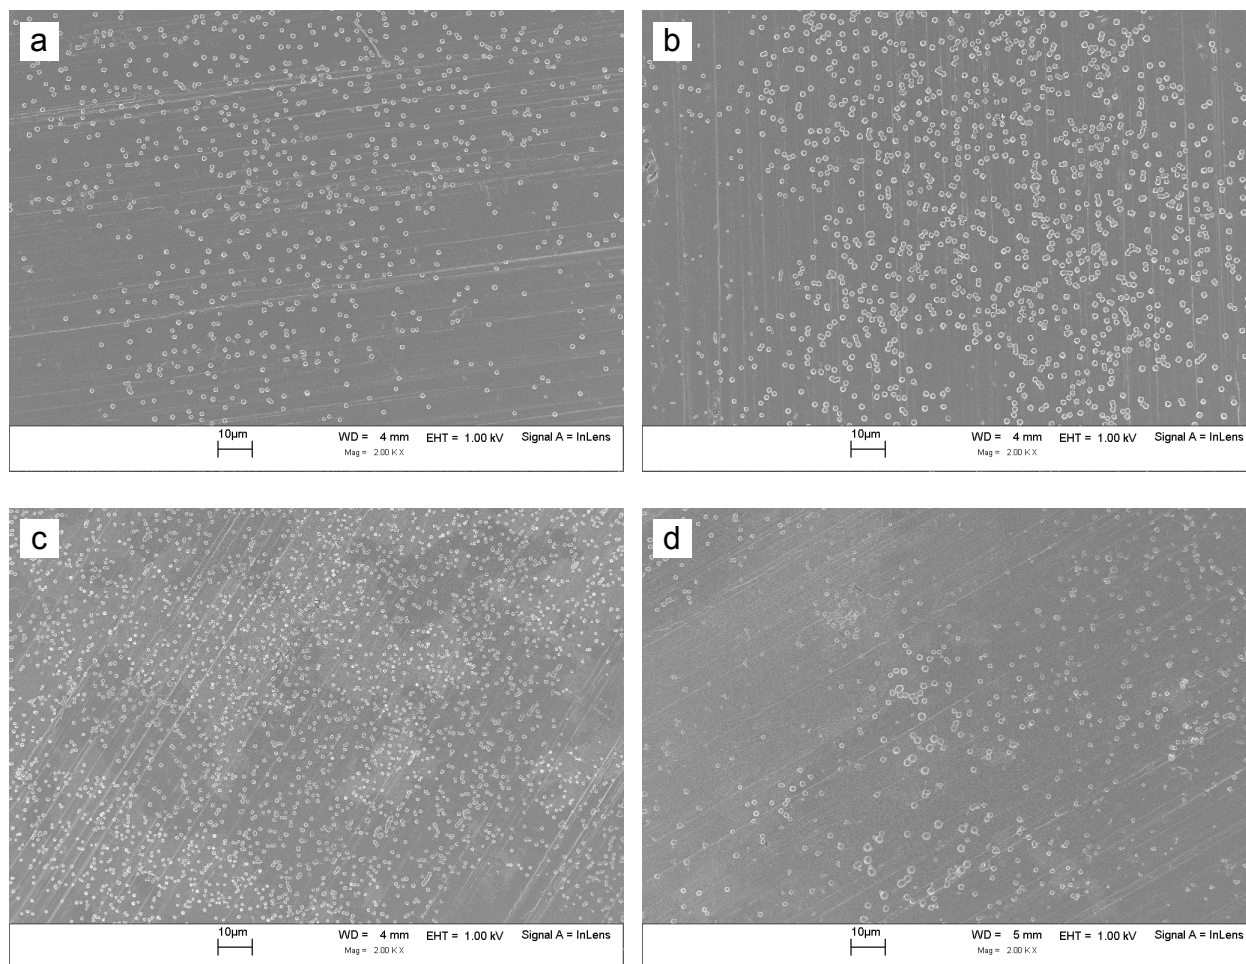

**Figure S4.** Lower magnification images of select images of Figure 7; reaction mixture N/S ratios of (a) 0.33, (b) 0.66, (c) 0.99, (d) 1.66.
